# Supplementary material for: Insights into the structure and function of the histidine kinase ComP from Bacillus amyloliquefaciens based on molecular modeling
Source: Oxford University Press journal article supplement (doi:10.1042/bsr20220352), 2022-09-02
Supplement: bsr-2022-0352_supp.pdf [file bsr-2022-0352_supp.pdf]

### Supplementary Materials:

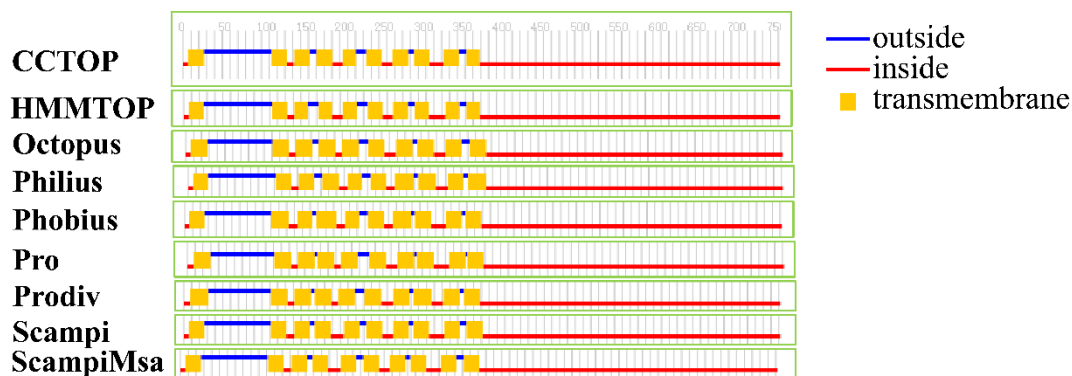

| Softwares        | N terminal | Numbers of TMs | PDZ domain | C terminal |
|------------------|------------|----------------|------------|------------|
| <b>CCTOP</b>     | inside     | 10             | outside    | inside     |
| <b>HMMTOP</b>    | inside     | 10             | outside    | inside     |
| <b>Octopus</b>   | inside     | 10             | outside    | inside     |
| <b>Philius</b>   | inside     | 10             | outside    | inside     |
| <b>Phobius</b>   | inside     | 10             | outside    | inside     |
| <b>Pro</b>       | inside     | 10             | outside    | inside     |
| <b>Prodiv</b>    | inside     | 10             | outside    | inside     |
| <b>Scampi</b>    | inside     | 10             | outside    | inside     |
| <b>ScampiMsa</b> | inside     | 10             | outside    | inside     |

Figure S1. The secondary structure of BaComP predicted by nine different online softwares, including CCTOP, HMMTOP, Octopus, Philius, Phobius, Pro, Pro-div, Scampi and ScampiMsa.



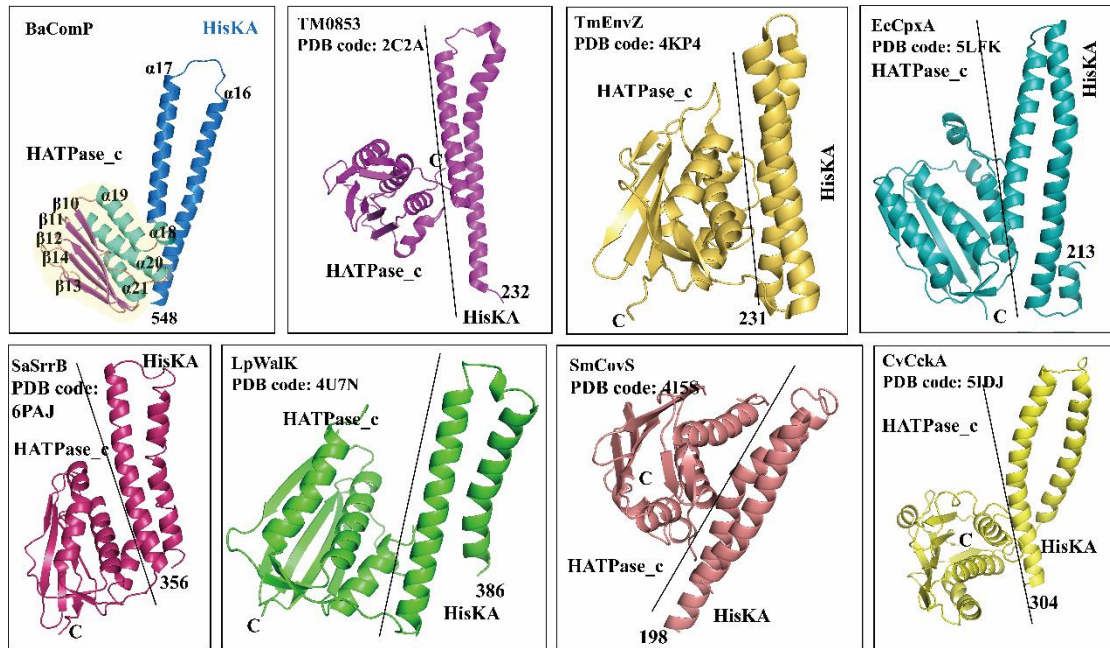

Figure S3. The overall foldings of the HisKA and HATPase\_c domains from ComP and its homologous proteins. The molecules are viewed along with the cartoon.

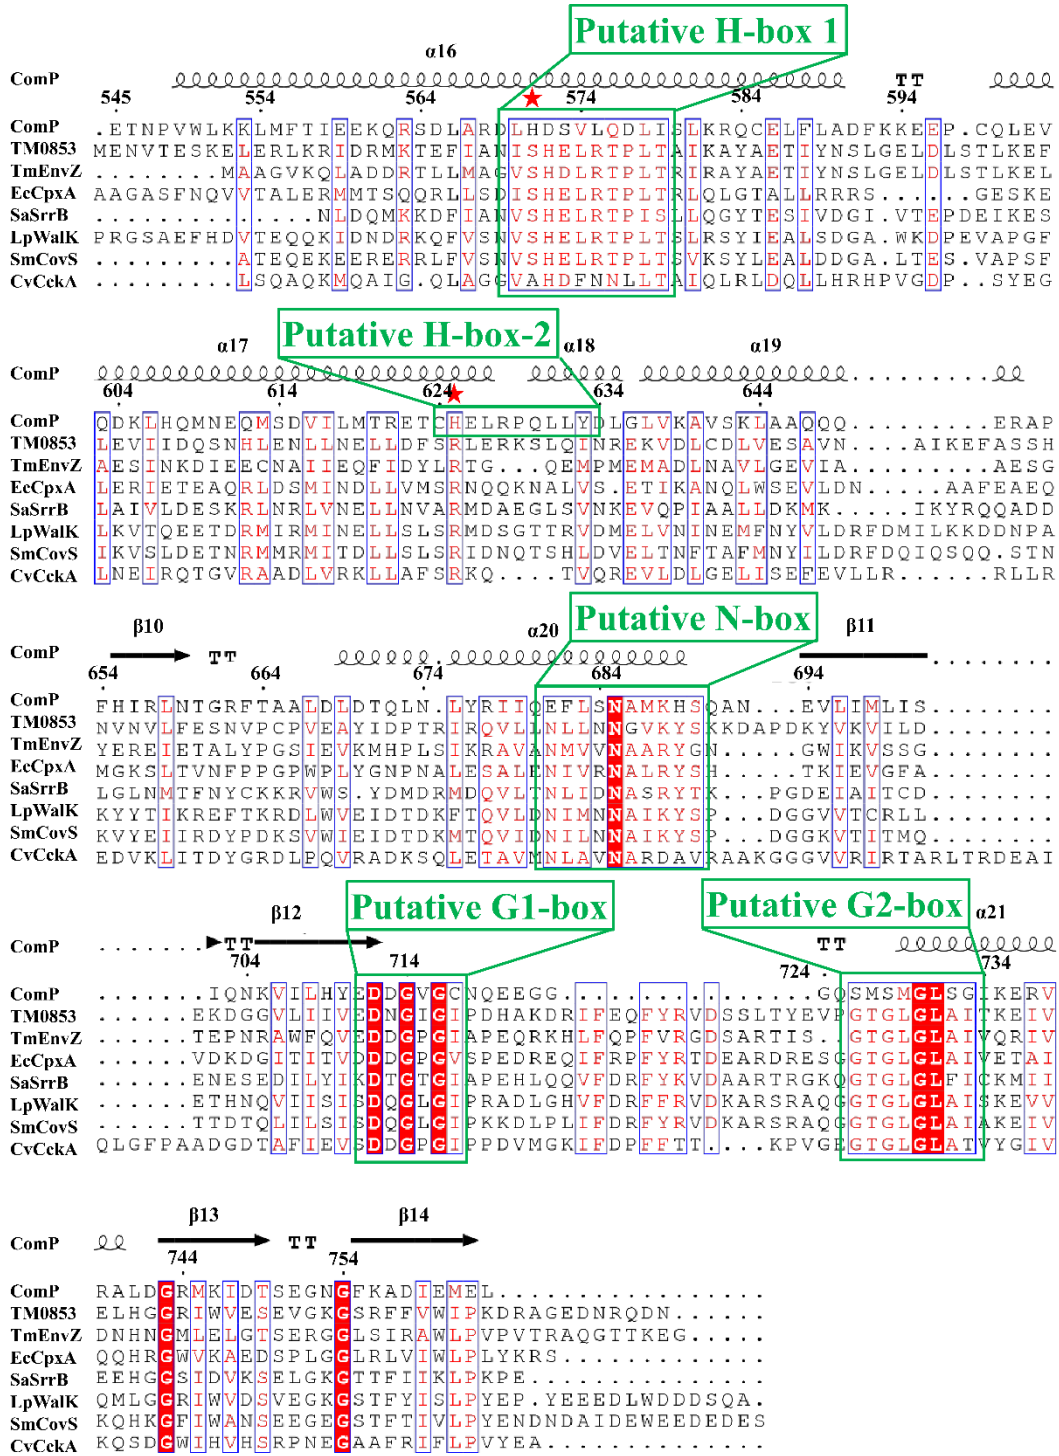

Figure S4. Sequence alignment of BaComp and its homologous proteins. Conserved residues are shown as white letters on a red background, and similar residues are shown as red letters in blue boxes.

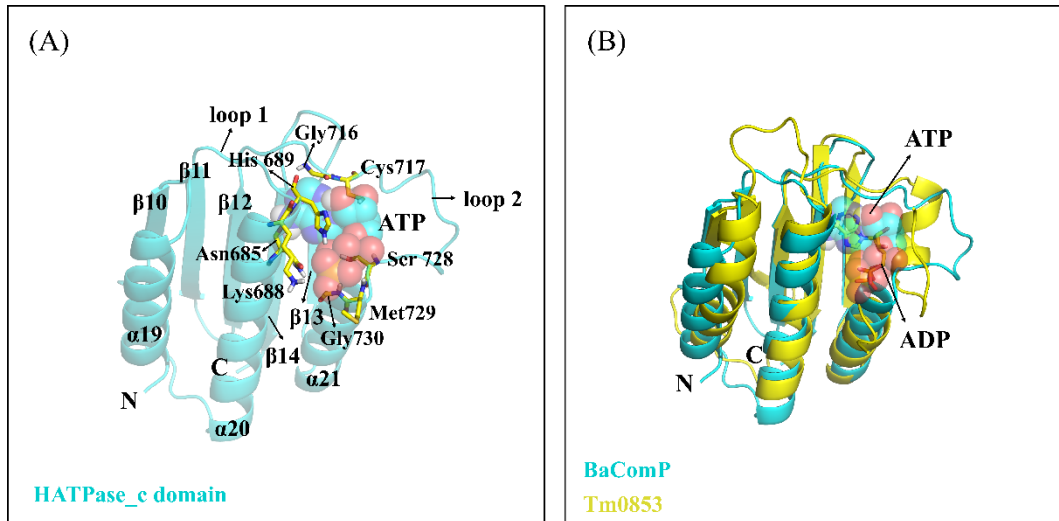

Figure S5. The ATP-binding mechanism of BaComP. (A) The ATP-binding mechanism of BaComP analyzed by HADDOCK and GROMACS. (B) The comparison of the substrate-binding pocket of BaComP and Tm0853.

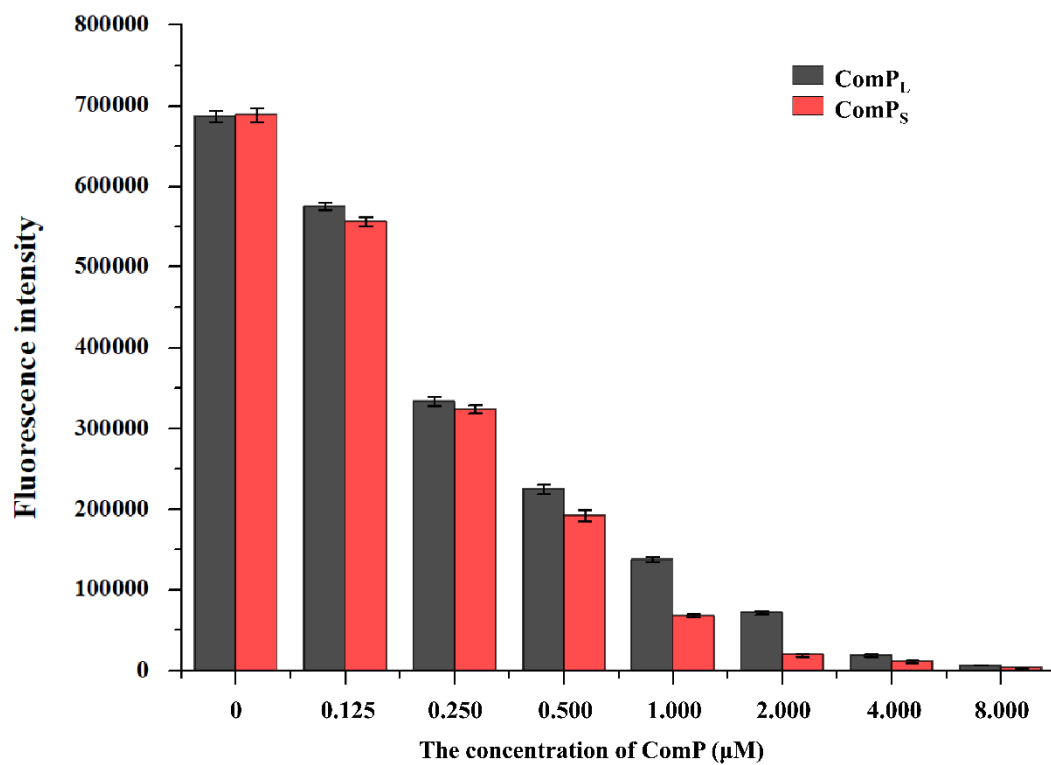

Figure S6. Identification of kinase activity of ComP<sub>L</sub> and ComP<sub>S</sub> detected by Kinase-Glo Luminescent Kinase Assay Kit.

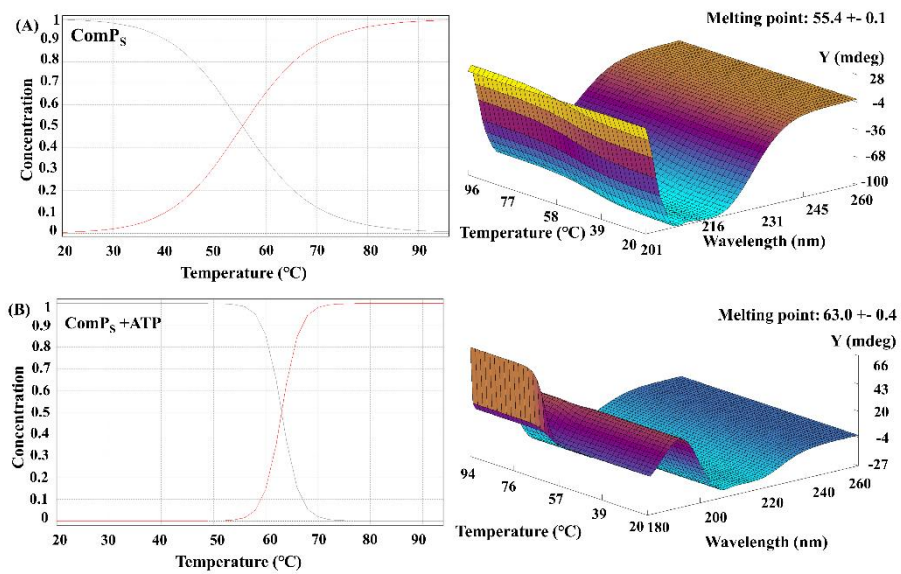

Figure S7. The  $T_m$  values of ComPs. (A) The  $T_m$  value of ComPs. (B) The  $T_m$  value of ComPs in the presence of ATP.

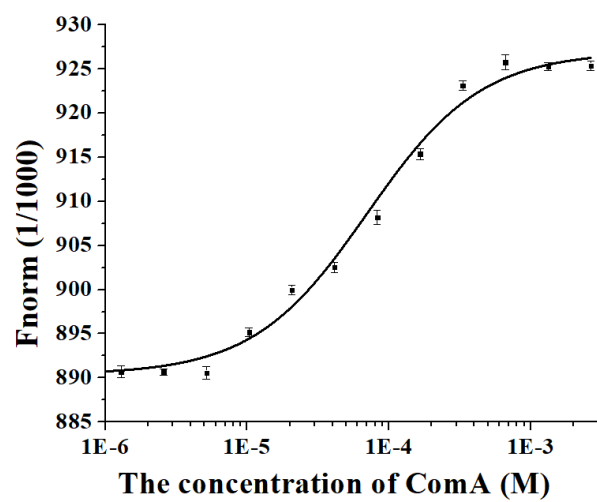

Figure S8. The binding affinity between ComPs and ComA by MST analysis.



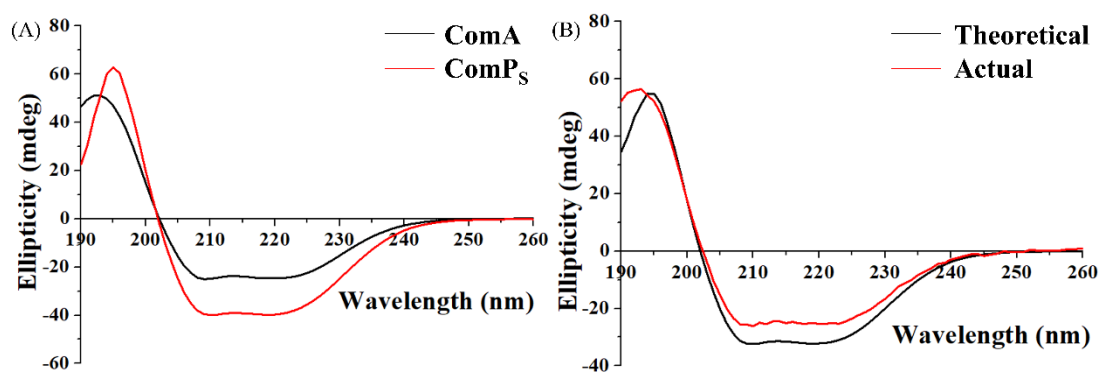

Figure S9. Interaction of ComP<sub>S</sub> with ComA by circular dichroism. (A) Individual CD spectra of ComP<sub>S</sub> and ComA. (B) Comparison of the CD spectra of ComP<sub>S</sub> incubated with ComA obtained experimentally (Actual) and the theoretically expected spectrum (Theoretical, the average of the two proteins) if no conformational change occurred.
